# Supplementary material for: A cocrystallisation-based strategy to construct isostructural solids
Source: Royal Society of Chemistry journal article supplement (doi:10.1039/b805816d), 2008-01-01
Supplement: b805816d.pdf [file b805816d.pdf]

# A cocrystallisation-based strategy to construct isostructural solids

## Supplementary Material

Dominik Cinčić, Tomislav Friščić and William Jones\*

|                  |                                                                                          |   |
|------------------|------------------------------------------------------------------------------------------|---|
| <b>Figure S1</b> | PXRD pattern for pure <b>acr</b> reactant                                                | 2 |
| <b>Figure S2</b> | PXRD pattern for pure <b>phen</b> reactant                                               | 2 |
| <b>Figure S3</b> | PXRD pattern for the ( <b>acr</b> )( <b>ipb</b> ) cocrystal constructed via grinding     | 3 |
| <b>Figure S4</b> | PXRD pattern simulated for the single crystal structure of ( <b>acr</b> )( <b>ipb</b> )  | 3 |
| <b>Figure S5</b> | PXRD pattern for the ( <b>phen</b> )( <b>ipb</b> ) cocrystal constructed via grinding    | 4 |
| <b>Figure S6</b> | PXRD pattern simulated for the single crystal structure of ( <b>phen</b> )( <b>ipb</b> ) | 4 |
| <b>Figure S7</b> | PXRD pattern for the ( <b>acr</b> )( <b>bpb</b> ) cocrystal constructed via grinding     | 5 |
| <b>Figure S8</b> | PXRD pattern simulated for the single crystal structure of ( <b>acr</b> )( <b>bpb</b> )  | 5 |
| <b>Figure S9</b> | PXRD pattern for the ( <b>phen</b> )( <b>bpb</b> ) cocrystal constructed via grinding    | 6 |

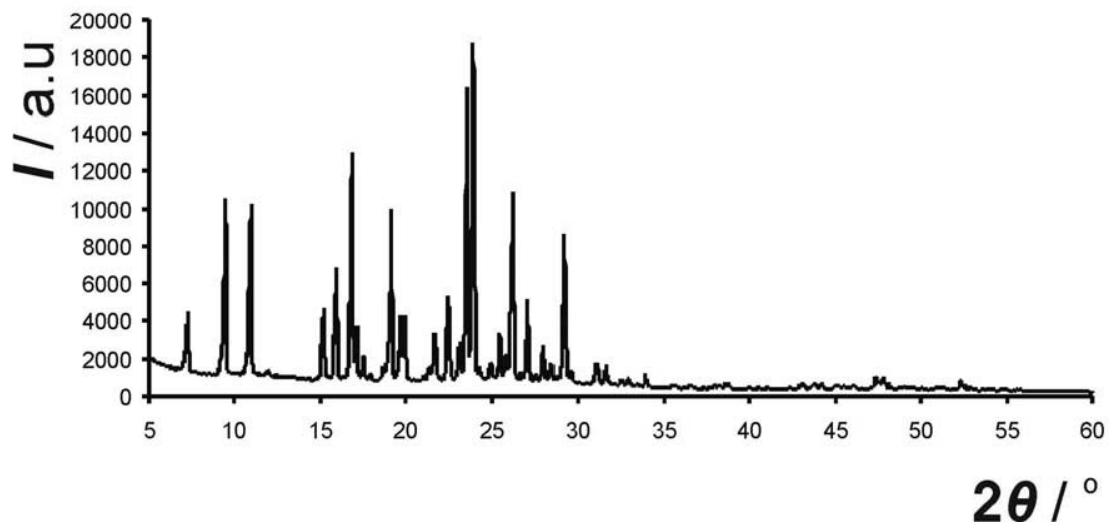

**Figure S1.** PXRD pattern for pure **acr** reactant.

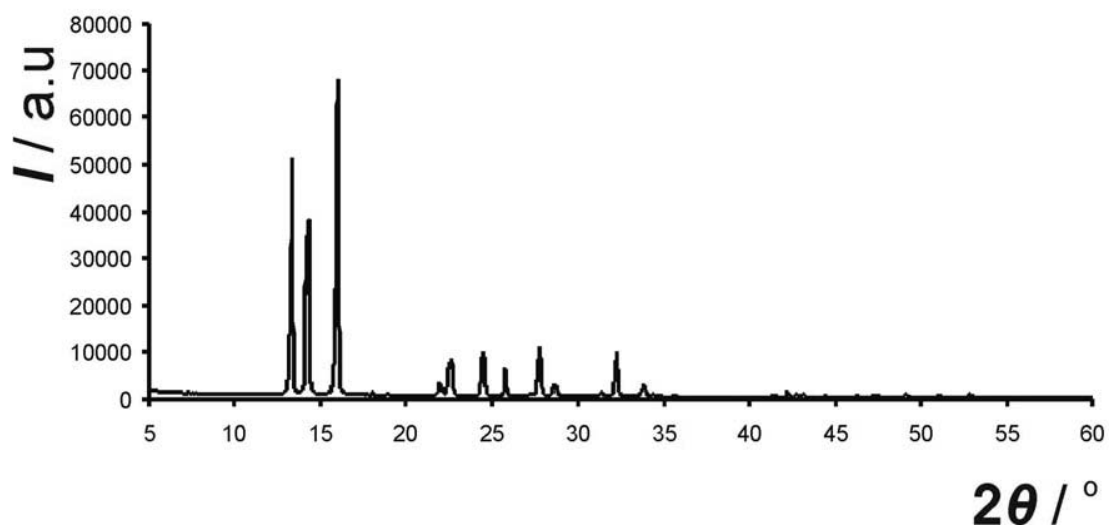

**Figure S2.** PXRD pattern for pure **phen** reactant.

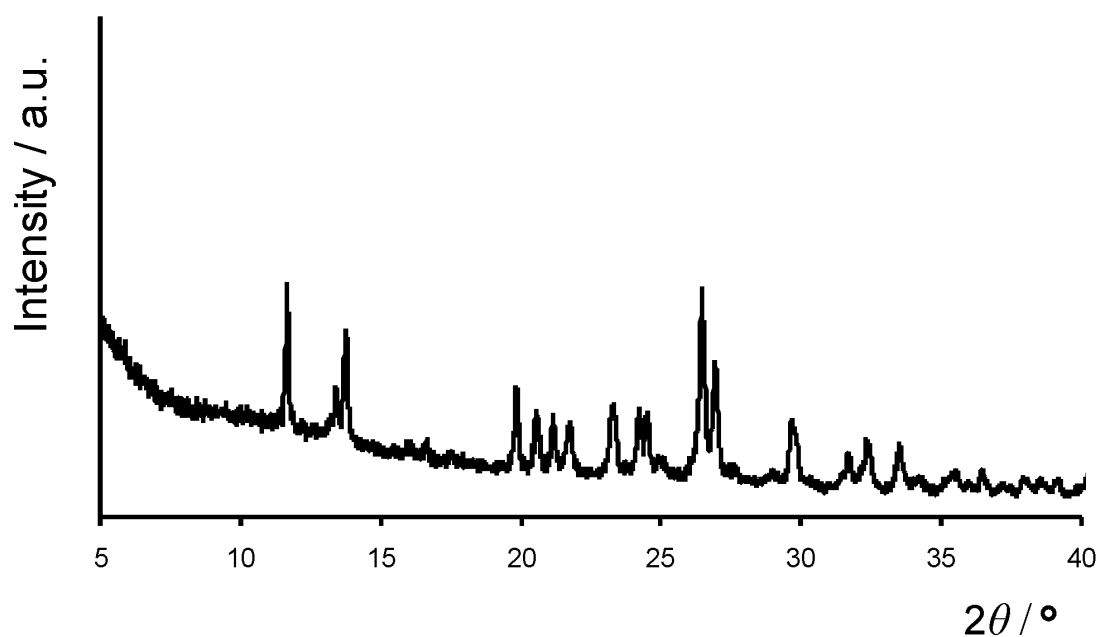

**Figure S3.** PXRD pattern for the (acr)(ipb) cocrystal constructed via grinding.

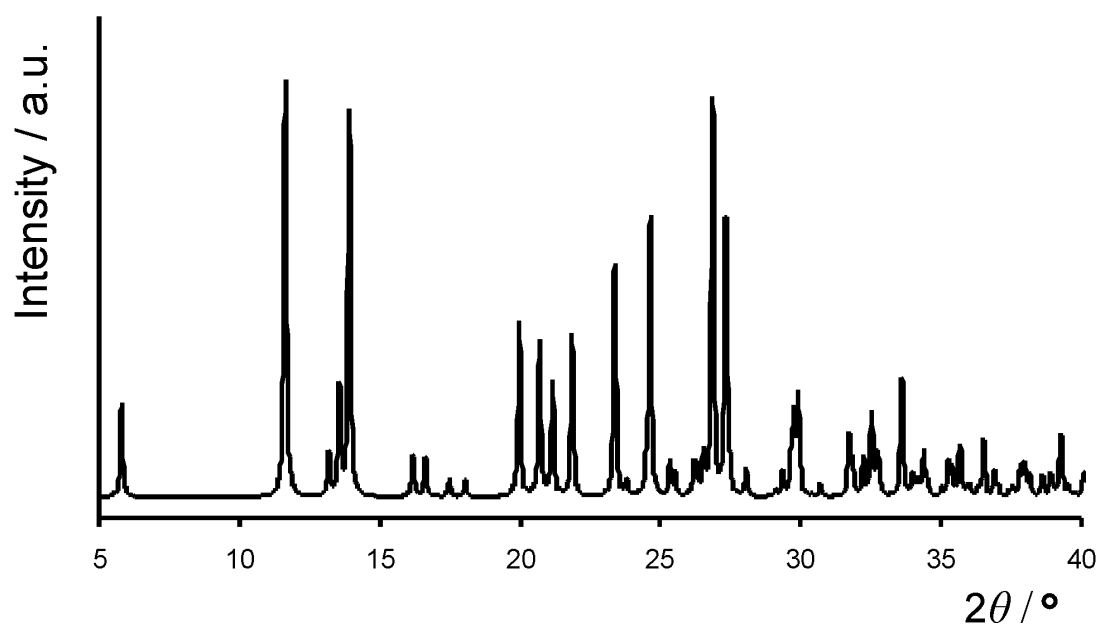

**Figure S4.** PXRD pattern simulated for the single crystal structure of (acr)(ipb).

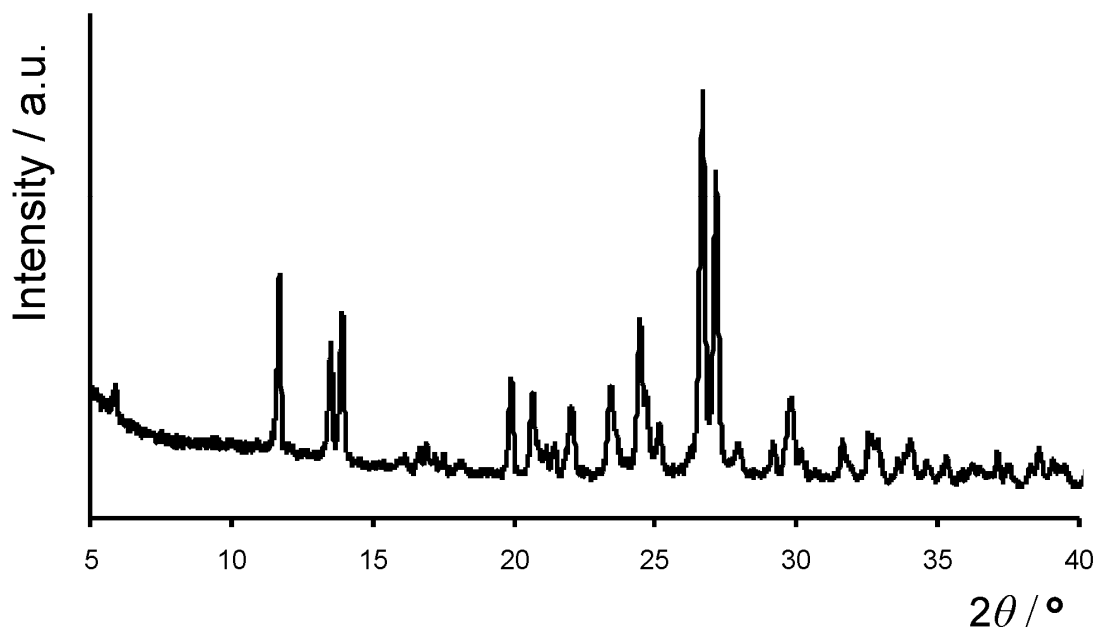

**Figure S5.** PXRD pattern for the **(acr)(bpb)** cocrystal constructed via grinding.

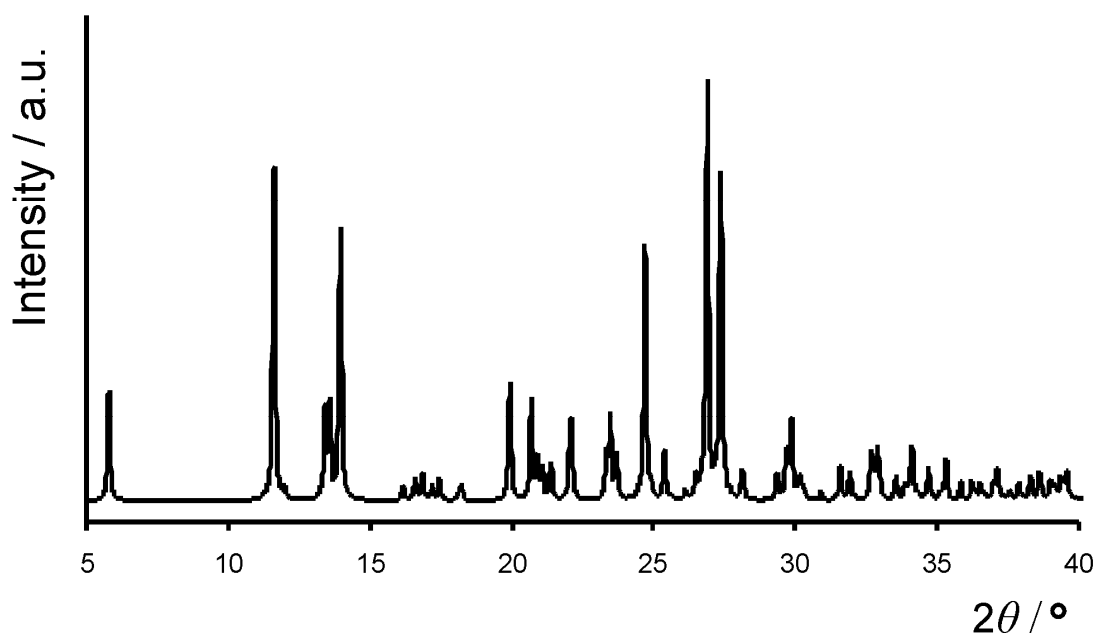

**Figure S6.** PXRD pattern simulated for the single crystal structure of **(acr)(ipb)**.

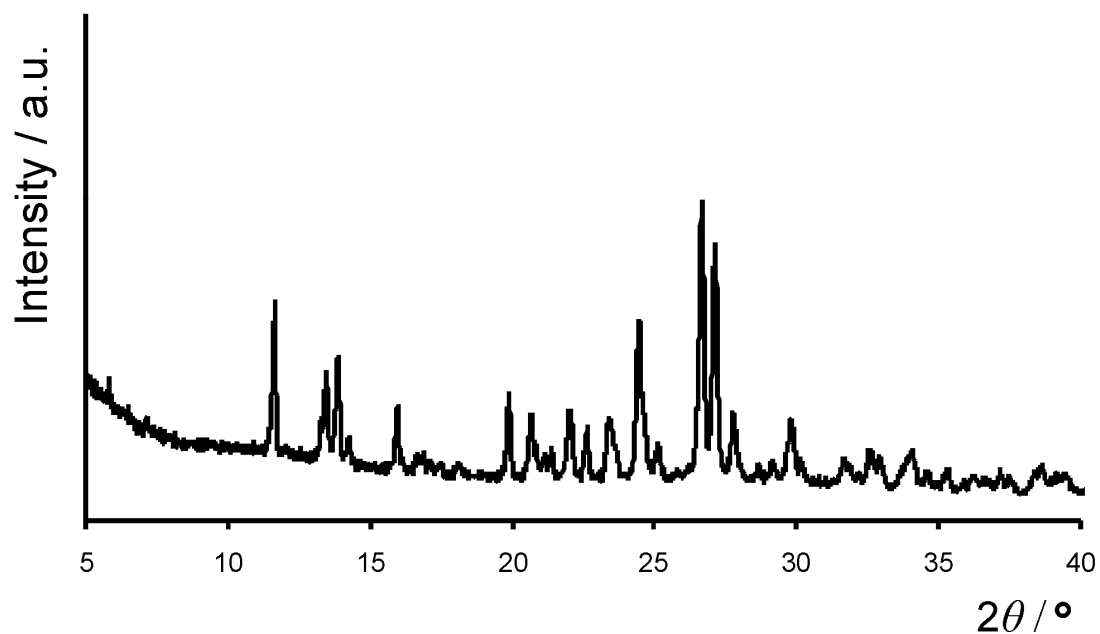

**Figure S7.** PXRD pattern for the (phen)(ipb) cocrystal constructed via grinding.

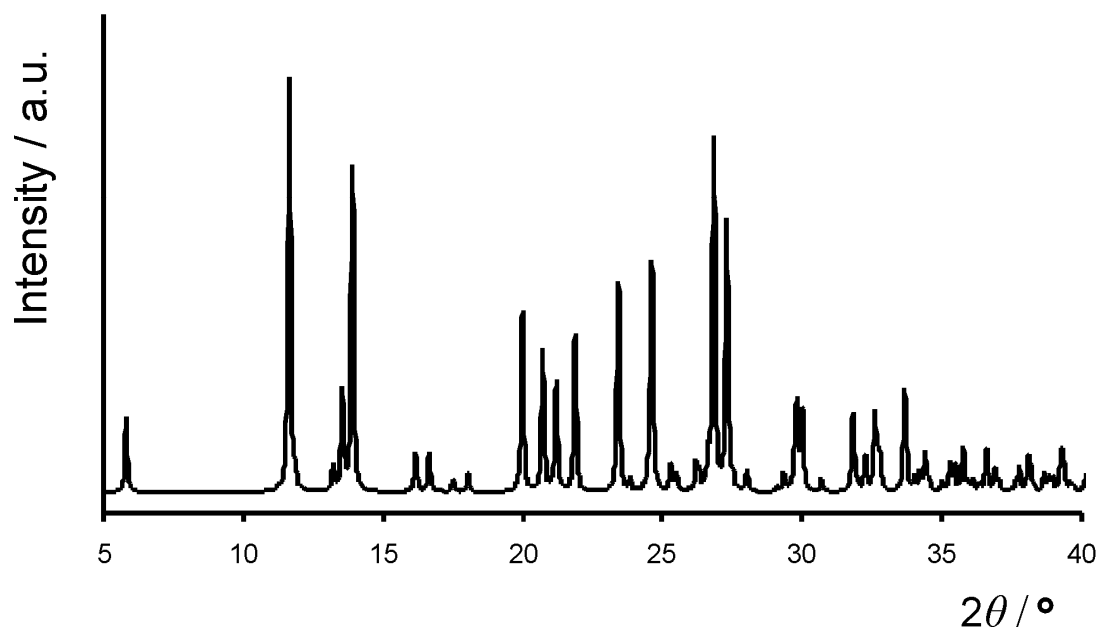

**Figure S8.** PXRD pattern simulated for the single crystal structure of (phen)(ipb).

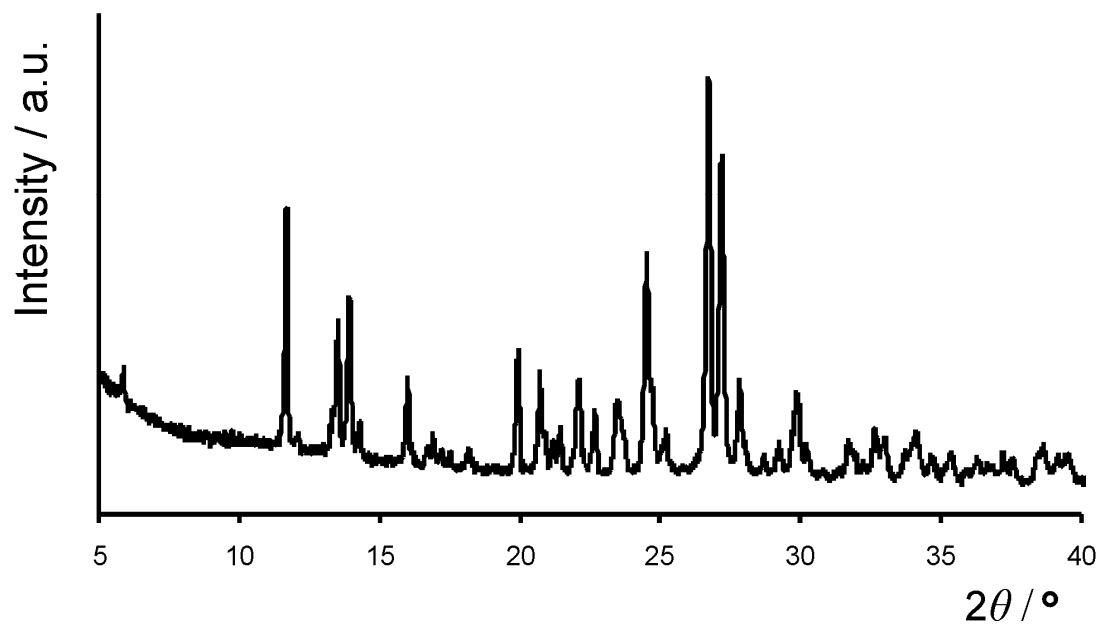

**Figure S9.** PXRD pattern for the **(phen)(bpb)** cocrystal constructed via grinding.
